# Supplementary material for: Photoelectric properties of reduced-graphene-oxide film and its photovoltaic application
Source: Royal Society of Chemistry journal article supplement (doi:10.1039/c5ra05490g), 2015-01-01
Supplement: c5ra05490g1.pdf [file c5ra05490g1.pdf]

## Supplementary Information

### Photoelectric properties of reduced-graphene-oxide film and its photovoltaic application

Hang He, Xuegong Yu\*, Yichao Wu, Haiyan Zhu, Xinhui Mu, Deren Yang

*State Key Laboratory of Silicon Materials and Department of Materials Science and Engineering,*

*Zhejiang University, Hangzhou 310027, China*

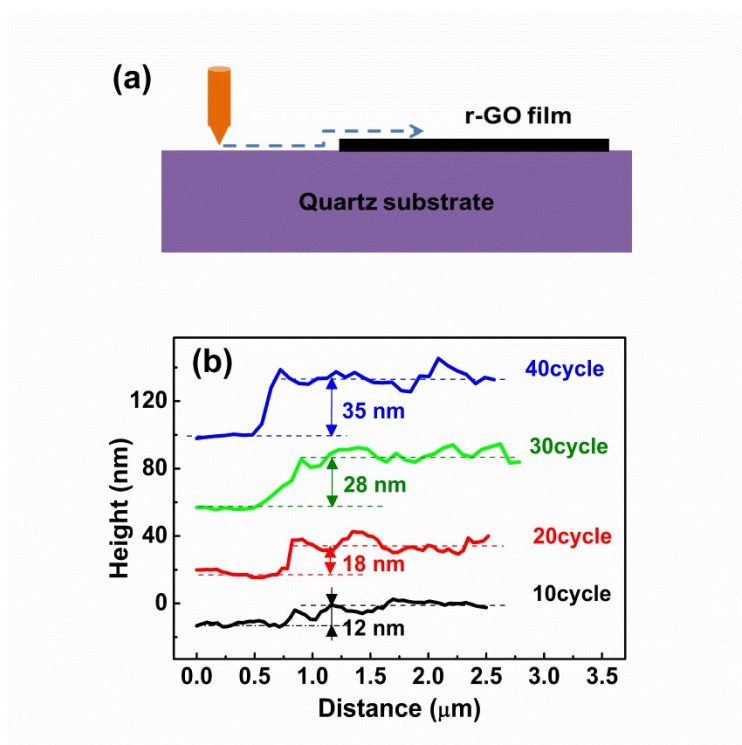

**Figure S1** (a) Schematic diagram for r-GO film thickness measurement. (b) r-GO film thickness measured by step profiler for 10, 20, 30, 40 cycles.

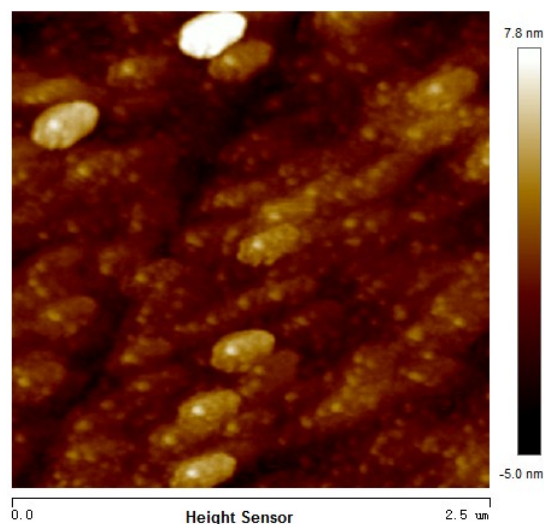

**Figure S2** Two dimensional AFM image in the scale of  $2.5 \mu\text{m} \times 2.5 \mu\text{m}$  for 18 nm r-GO film after  $950^\circ\text{C}$  annealing.

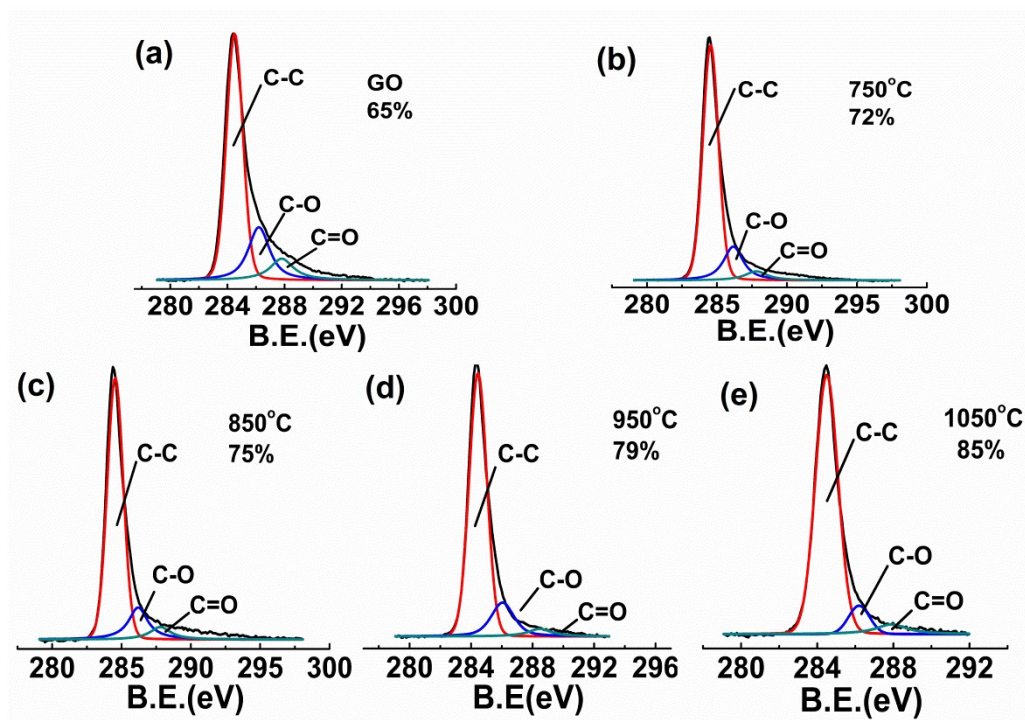

**Figure S3** High-resolution XPS analysis of the original GO film and 18 nm r-GO films after 750-1050 °C annealing. Deconvolution reveals the presence of C-C (284.8 eV), C-O (286.2 eV), C=O (287.8 eV) species in r-GO film. The percentage of deoxidized carbon (C-C, 284.5 eV) in each film is indicated in the figure. (a) GO film. (b) 750 °C. (c) 850 °C. (d) 950 °C. (e) 1050 °C.

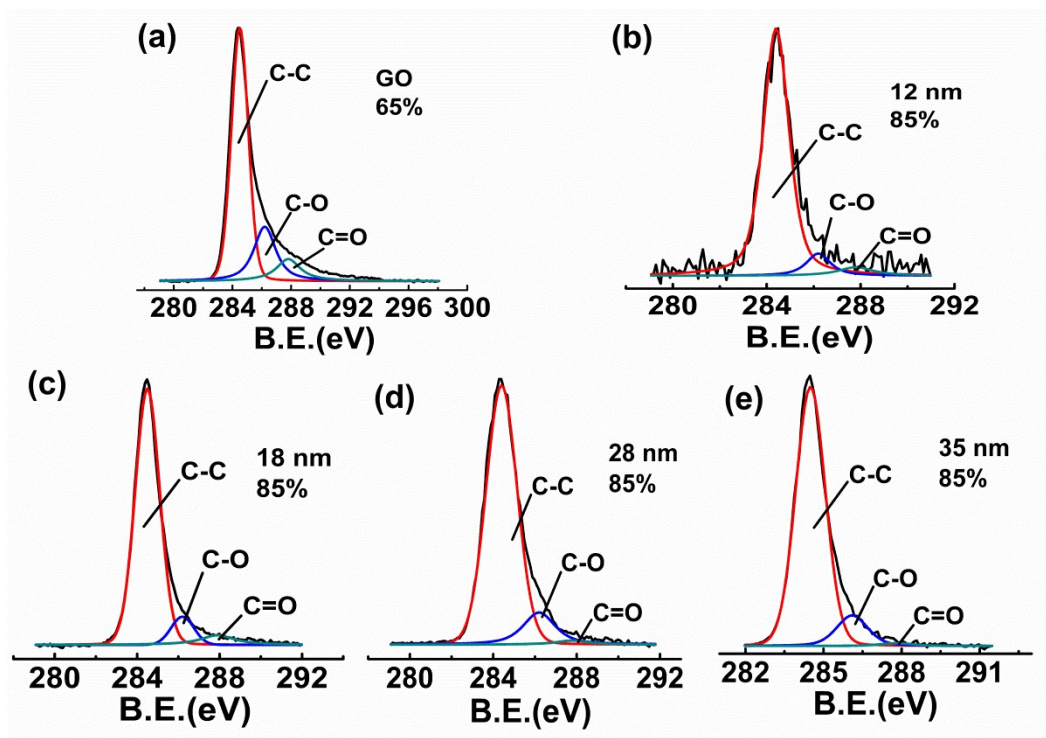

**Figure S4** High-resolution XPS analysis of the original GO film and 12-35nm r-GO films after 1050 °C annealing. Deconvolution reveals the presence of C-C (284.8 eV), C-O (286.2 eV), C=O (287.8 eV) species in the film. The percentage of deoxidized carbon (C-C, 284.5 eV) in each film is indicated in the figure. (a) GO film. (b) 12 nm. (c) 18 nm. (d) 28 nm. (e) 35 nm.

**Table S1** The detailed parameters of the GO/Si, CVD-Gr/Si, r-GO/Si devices.

| Devices   | $J_{sc}$<br>(mA/cm <sup>2</sup> ) | $V_{oc}$<br>(mV) | FF<br>(%) | PCE<br>(%)            |
|-----------|-----------------------------------|------------------|-----------|-----------------------|
| GO/Si     | 0.0088                            | 330              | 19.01     | $5.52 \times 10^{-4}$ |
| CVD-Gr/Si | 10.86                             | 370              | 49.52     | 1.99                  |
| r-GO/Si   | 20.48                             | 450              | 36.45     | 3.36                  |
